# Supplementary material for: The perception of palaeontology in commercial off-the-shelf video games and an assessment of their potential as educational tools
Source: Copernicus journal article supplement (doi:10.5194/gc-5-289-2022), 2022-09-27
Supplement: Supplementary file 1 [file gc-5-289-2022-supplement.zip]

Archive with 3 entries (3 files):
- Collectible_info.xlsx
- Palaeo games_v2.xlsx
- gc-5-289-2022-supplement-title-page.pdf
