# Supplementary material for: The perception of palaeontology in commercial off-the-shelf video games and an assessment of their potential as educational tools
Source: Copernicus journal article supplement (doi:10.5194/gc-5-289-2022), 2022-09-27
Supplement: Supplementary file 1 [file gc-5-289-2022-supplement.zip › Collectible_info.xlsx]

## Sheet: Sheet1
Picture	In Game Name	Game	In game information
a	Generic Fossil	No Man's Sky	“A well-preserved find, this fossil gives a glimpse of the strange creatures that used to roam this world”
b	Prehistoric Skull (Ground Sloth)	Stardew Valley	“This is definitely a mammalian skull”
c	Trilobite	Stardew Valley	“This must've washed up ages ago from an ancient coral reef”
d	Nautilus Fossil	Stardew Valley	“A long extinct relative of the crab”
e	Dinosaur bone	Red Dead Redemption 2	N/A
f	Enormous Trilobite	The Sims 4	“Trilobite means three lobes. It does not mean being bit at a strength three times a normal bite. If that were the case, arthropods would be terrifying!”
g	Raptor Claw	The Sims 4	“This claw's owner was a pack hunter, so her attack would come not from the front, but from the side -- from the other two raptors you didn't even know were there. Clever girl.”
h	Perfectly Preserved Mustache	The Sims 4	“This fossil marks the passing of an ancient gentleman of true class. A gentleman who fell face-first into some ancient mud.”
i	T. rex Skull	Starbound	"A dinosaur once native to Earth, spread across the stars by overeager scientists."
j	Ammonite	Starbound	"Ammonites are widely recognised fossils, with variations appearing on most life-sustaining planets."
k	Sabertooth Skull	Starbound	"Sabertooth are widely recognised fossils, easily identifiable by their elongated canine teeth."
l	Fern Fossil	Starbound	"Fossilised fern leaves are evidence of organic life from millennia ago."
m	Footprint Fossil	Starbound	"The size of this footprint indicates it was probably made by an adult male of the species."
n	Fossil Rib Cage	Minecraft	N/A
o	Fossil Helix	Pokémon series	A fossil of a Pokémon that lived in prehistoric times.
p	Anomalocaris	Animal Crossing: New Horizons	"Anomalocaris lived in the water long before the dinosaurs and are known for their, er, "distinctive" look. Flat bodies over three feet in length, bulging eyes like a...dragonfly, antennae like shrimp tails... They looked so peculiar that people originally thought they were multiple fossils stacked on top of each other! As a delightful side note, "anomalocaris" means "abnormal shrimp." Obviously …
q	Coprolite	Animal Crossing: New Horizons	"Coprolites are, in fact...ehm...bits of fossilized...feces. Hoo! Eww! It's true! It must be said they are also astonishing treasure troves of ancient information, eh wot! For example, the coprolite from certain plant-eating dinosaurs has been found to contain small pebbles. This tells us that these dinosaurs, like many modern birds, ate rocks to help grind the greens in their bellies. Indeed! Fo…
r	Ammonite	Animal Crossing: New Horizons	"Ammonites were creatures that lived before and all the way through the age of dinosaurs! Because different species lived at different times, their shells are sometimes used as "index fossils." In other words, these creatures act as markers in time, helping to identify the age of other formations! Who knows what other secrets lie hidden in those spiral shells?"
s	Shark-tooth Pattern	Animal Crossing: New Horizons	"This shark-tooth pattern comes from the lower jaw of an ancient shark of the genus Helicoprion. Its teeth seem to have grown in a distinctive arrangement rather disturbingly termed a 'tooth-whorl.' I say 'seem' because shark skeletons are made of not bone, but cartilage, except for their teeth. Consequently, their bodies are never preserved as fossils, and questions about their jaws remain unans…
t	Ophthalmosaurus	Animal Crossing: New Horizons	"The adorable Opthalmosaurus—cutest of all the Ichthyosaurs! What makes a large, sea-dwelling reptile cute, you may ask? I shall tell you... The eyes! Opthalmosaurus's name means "eye lizard," and its face was quite dominated by those great orbs! Beside their cutifying effect, these eyes gave the creature great vision, making it a very successful hunter. And no doubt because its big, doe eyes lul…
