# Supplementary material for: The perception of palaeontology in commercial off-the-shelf video games and an assessment of their potential as educational tools
Source: Copernicus journal article supplement (doi:10.5194/gc-5-289-2022), 2022-09-27
Supplement: Supplementary file 1 [file gc-5-289-2022-supplement.zip › gc-5-289-2022-supplement-title-page.pdf]

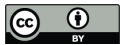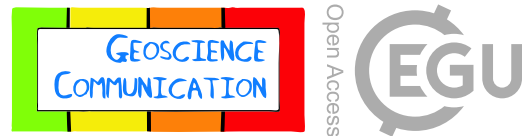

## *Supplement of*

# **The perception of palaeontology in commercial off-the-shelf video games and an assessment of their potential as educational tools**

**Thomas Clements et al.**

*Correspondence to:* Thomas Clements ([clements.taph@gmail.com](mailto:clements.taph@gmail.com))

- [gc-5-289-2022-supplement-title-page.pdf](#)
- [Collectible\\_info.xlsx](#)
- [Palaeo games\\_v2.xlsx](#)

The copyright of individual parts of the supplement might differ from the article licence.
