# Supplementary material for: The perception of palaeontology in commercial off-the-shelf video games and an assessment of their potential as educational tools
Source: Copernicus journal article supplement (doi:10.5194/gc-5-289-2022), 2022-09-27
Supplement: Supplementary file 1 [file gc-5-289-2022-supplement.zip › Palaeo games_v2.xlsx]

## Sheet: Steam Palaeo Games
Steam Games:	2022-02-01
Year:	Name:	Total per yr			Steam games	Tagged games	Avg rating
2006	Dynomite Deluxe	1		2011	329	1	81.9
2007	Tomb Raider Anniversary	1		2012	414	2	78.39
2011	Dino D-Day	1		2013	551	2	80.16
2012	Tomb Raider I	2		2014	1631	3	68.4967
	Primal Carnage			2015	2679	16	69.7125
2013	Go home Dinosaurs!	2		2016	4466	20	67.1875
	Orion Prelude			2017	6251	33	64.0679
2014	Super Time Force Ultra	3		2018	8137	44	62.3951
	Wildlife Park 2 - Dino World			2019	7841	21	65.5067
	Hazard Ops			2020	9609	43	63.668
2015	Wildlife park - wild creatures	16		2021	10696	40	66.9185
	Carnivores: Dinosaur Hunter Reborn
	Dinosaur Hunt
	Dino Run DX			Tags:		Hits:
	JumpJet rex			Palaeontology	Paleontology	8
	The Isle			Palaeo	Paleo	19
	Primal Carnage Extinction			Fossil		26
	Caveman Craig			Dinosaur		525
	Lego Jurassic Park			Mammoth		51
	Turok			Raptor		127
	Lego Jurassic World			Jurassic		62
	Iggy's Egg Adventure			Cretaceous		8
	Dinosystem
	There was caveman
	Deer Hunt Legends
	theHunter: Primal
2016	Dino Eggs: Rebirth	20
	Guardians of Orion (Phase 2)
	Jurassic Survival
	Curious Expedition
	Raptor Valley
	Tyto Ecology
	Prehistoric Tales
	In case of emergency, release raptor
	Time Machine VR
	Dinocide
	Jigsaw Puzzle Pack - Pixels puzzles ultimate dinosaurs
	Tasty Planet: Back for Seconds
	Alchemist Penguin
	Day D: Tower Rush
	Evolution Planet: Gold Edition
	Dashing Dinos
	Rexodus: A VR Story Experience
	Dino Fense
	Crazy Otto
	Far Cry Primal
2017	Dinosaur Forest	33
	Dinosaurs A Prehistoric Adventure
	Lost With Dinosaurs
	Dinosaur Island
	Lost Eden
	Derpy Dinos
	Saruian
	The Archotek Project
	Dinosis Survival
	Robinson: the Journey
	T-Rex Time Machine
	Jungle Dino VR
	Total War WarHammer 2
	Turok 2
	Rex: Another Island
	Abzu
	No Man's Sky
	Ark: Survival Of the Fittest
	Cold Vengence
	NokBak
	Doug and Lily
	Primal reign
	Ark: Survival Evolved
	Palaeo Museum VR
	Tabletop simulator - Great Dinosaur Rush
	The Mammoth: A Cave Painting
	Dinosaur Hunter First Blood
	EZY
	Dino Scourge
	Adventure Golf VR
	Tyto Ecology - Cretaceous Mongolia
	Birthdays the Beginning
	colision course
2018	Animal memory: Dinosaurs	44
	Intelligence: Dinosaurs
	Dinosaur Hunt Puzzle
	Géants disparus VR
	Paleocalypse
	Dinosaur Life VR
	Fossil Hunters
	Colour by numbers: Dinosaur
	Explosive Dinosaurs
	Dinosaur Safari VR
	Dinosaur Hunter
	Wrath of Goliaths: Dinosaurs
	Dinosaur Hunter VR
	Jurassic World Evolution
	Dinosaur Zoo
	Jurassic Safari Hunt
	Damnosaur
	Beast Battle Simulator
	Dimetrosaur
	Hero Hunters 3D
	Super Saurio Fly: Jurassic Edition
	Beasts of Bermuda
	Time Carnage VR
	Collision Course
	RoboVDino
	DinoTrek
	Bomb Hunter MT
	Dinoknights
	CPRC: Apex Hunters
	Raptor: Cretaceous Island
	The Humans Collection
	Ark Park
	Where time stood still
	Dino Dawn
	Jurassic City Walk
	Mesozoica
	Rocket League - Jurassic World Car Park
	Epic Roller Coaster - T Rex Kingdom
	Caveman Chuck
	Oakwood
	Prehistoria
	Roarr! The Adventures of rampage Rex
	Subnautica
	Dino Delivery
2019	Dinosaur Hunting Patrol 3D MO	21
	Furry Shakespeare: Dashing Dinosaurs & sexy centaurs
	Dinosaur Bone Digging
	Feed a titanosaur
	PixARK
	War Party
	Dino Zoo Transport Simulator
	Radical Rex
	Laranga
	Dino Tour VR
	The Sapling
	Evolution Board Game
	Chronoraptor
	Primal Pursuit
	Bleeding Hunt VR
	The hunt in the forest
	Island 1979
	Red Dead Redemption 2
	age of wonders planet fall
	dawn of man
	turok: escape from the last valley
2020	Dinosaur Fossil Hunter: Prologue	43
	Young Archaeologist
	Game of Puzzles: Dinosaurs
	Dinosaur Shakespeare: To Date or not to date?
	Dinosaur Hunting Patrol VR
	Pteranodon Flight: The flying Dinosaur Game
	Island Saver - dinosaur island
	Fantasy Grounds - Pathfinder 2 RPG - Extinction curse AP4: Siege of the Dinosaurs
	Parkasaurus
	Zniw Adventure
	Dinohazard: Chronos Blackout
	dino game
	Second Extinction
	Dimetrosaur 2
	Prehistoric Hunt
	City Monsters
	Gigantosaurus the Game
	VR Jurassic Escape
	Cork the Volcano
	Tikalec and the Dino Moonbase
	Pangea Survial
	Isle of Pangea
	Xenociders
	REPTOMUM
	Archeologist Simulator
	Animal Revolt Battle Simulator
	Horizon Zero Dawn
	Baby Dino Adventures
	Attack of the Giant Mutant Lizard
	Yrek: Lost in Portals
	Prehistoric Dude
	Beasts of 9500
	Evolution
	Kaiju Krashers
	Hunt: Primal Reptiles
	Ancestors: The Humankind Odyssey
	Fossil Corner
	Fossil fuel
	Fossil fuel VR: Raptor Isolation
	Mutant Alley: Do the Dinosaur
	Scientifically Accurate Dinosaur Mating Simulator 2021
	Lilys Dreams: Adventures of Dinosaurs
	Vr cute tanks: Girls and Dinosaurs
2021	Dinosaurs Prehistoric Survivors	40
	Brutal Dinosaur
	Escape Dinosaur Island
	Jurassic World Evolution 2
	Colouring Game 4 - Dinosaurs
	Cell to Singularity
	Dino Nest
	Dino Galaxy Tennis
	Dinogotchi
	Dino Cub
	Viking Heroes 2
	Caveman Hunt
	Hungry Dino
	Dinoscape
	Run Ralph Run
	Retro Classix: Joe & Mac Caveman Ninja
	Survival RPG 3: Lost in Time
	Zombie Dinos from the Planet Zeltoid
	Toothy History
	Ancient Dino Runner
	Reptiles: In Hunt
	Dino Lost
	Jurassic Mahjong
	Monkey Vs Dinosaur
	Dino Eruption
	Evolution of War
	Dinoland
	Curious Expedition 2
	Raptor Boyfriend: A Highschool romance
	Dininho Adventures
	Jet Kave Adventure
	Raptor Territory
	Jurassic Fantasy
	Dinoku
	Fossilfuel
	Pangea
	Prehistoric Marine Monster
	ASTRA
	Ancient Soccer
	Atlantis Adventure VR
2022	Monster Hunter Rise
	I've seen everything: More Dinosaurs
	Freestyle2 - Blue Dinosaur set
	Age of Jura
	Sancturary Island
	Dynopunk
	Primal threat
	Dinosaur Fossil Hunter
	Amber Isle
	Paleo Pines
	Paleon
	Age of caveman
	Goodlands
	The Painted Forest
	Paco the Jungle Duck
	Desktop Dinosaurs
	The Dinosaurs are here
	Isle of Dinosaurs 2D
	Dinosaur Race
	Jurassic Park: The Game
	DeathGround
	Compound Fracture
	The Podlands
	Theropods
	Jurassic Architect
	Fallen World
	Time Travelling Raptors
	Dino Island Adventure
	ET Superman: Wraith of Tyrannosaurus Rex
	Centurion rex
	MESOZOIKUM
	Jurassic Snap
	Prehistoric Kingdom
	Project Ferocious
	Dinos Reborn
	Mondo Museum
	Isles of Yore
	Terror of Hemasaurus
	The Depths: Prehistoric Survival
	Goodbye Volcano High
	Primal Domination
	The Return: Survival
	Goner
	VIP Rebels
	Monsters per second
	Kickrexing
	Space Captain McCallery - Episode 3: The Weaponmaster's Challenge
	Pinball FX3 - Jurassic World Pinball
	Dinosaurus Life
	Jurassic Attack
	Jurassic Island: The Dinosaur Zoo
